# Supplementary material for: Template free construction of a hollow Fe3O4 architecture embedded in an N-doped graphene matrix for lithium storage
Source: Royal Society of Chemistry journal article supplement (doi:10.1039/c4dt03795b), 2015-01-01
Supplement: c4dt03795b1.pdf [file c4dt03795b1.pdf]

## Template free constructing hollow Fe<sub>3</sub>O<sub>4</sub> architecture embedded in N-doped graphene matrix for lithium store

Guohui Qin <sup>a,b</sup>, Chengyang Wang <sup>a,b\*</sup>

*<sup>a</sup> School of chemical Engineering & technology, Tianjin University, Tianjin 300072 , China.*

*<sup>b</sup> Synergetic Innovation Center of Chemical Science and Engineering, Tianjin 300072, China.*

### Directory of contents

**Fig.S1(a)** N<sub>2</sub> adsorption and desorption isotherm and (b) pore size distribution of nitrogen-doped G-Fe<sub>3</sub>O<sub>4</sub>-N.

**Fig.S2** Charge/discharge curves of G-Fe<sub>3</sub>O<sub>4</sub>-N with different contents of graphene at 50mA g<sup>-1</sup> .

**Fig. S3(a)** The TEM image and **(b)** HRTEM image of G-Fe<sub>3</sub>O<sub>4</sub>-N after 200th cycles.

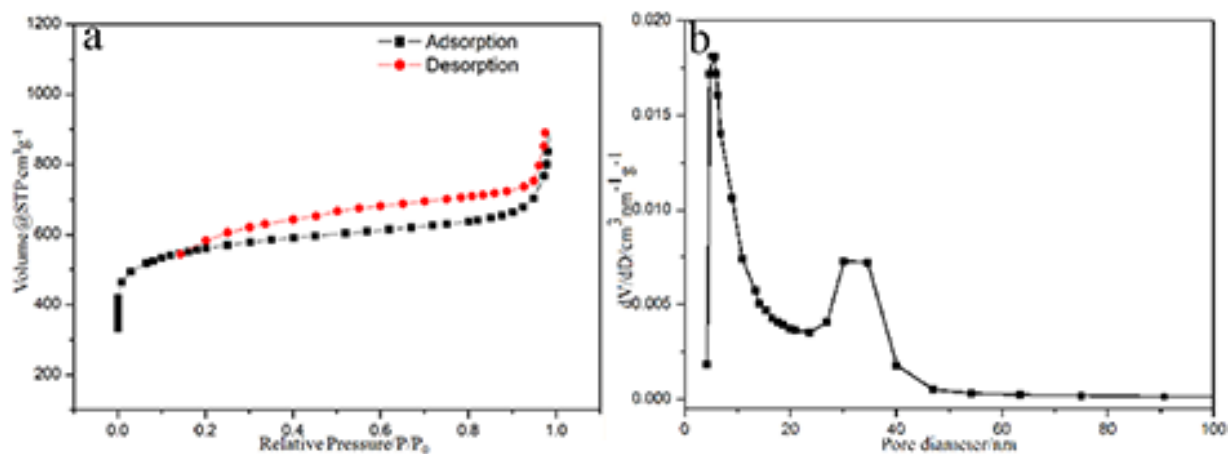

**Fig.S1(a)** N<sub>2</sub> adsorption and desorption isotherm and (b) pore size distribution of nitrogen-doped G-Fe<sub>3</sub>O<sub>4</sub>-N.

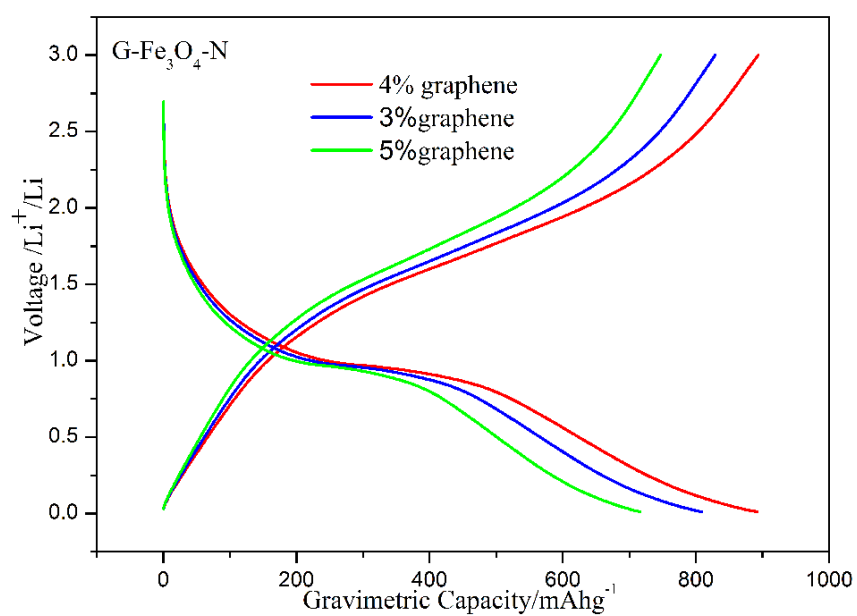

**Fig.S2** Charge/discharge curves of G-Fe<sub>3</sub>O<sub>4</sub>-N with different contents of graphene at 50mA g<sup>-1</sup>.

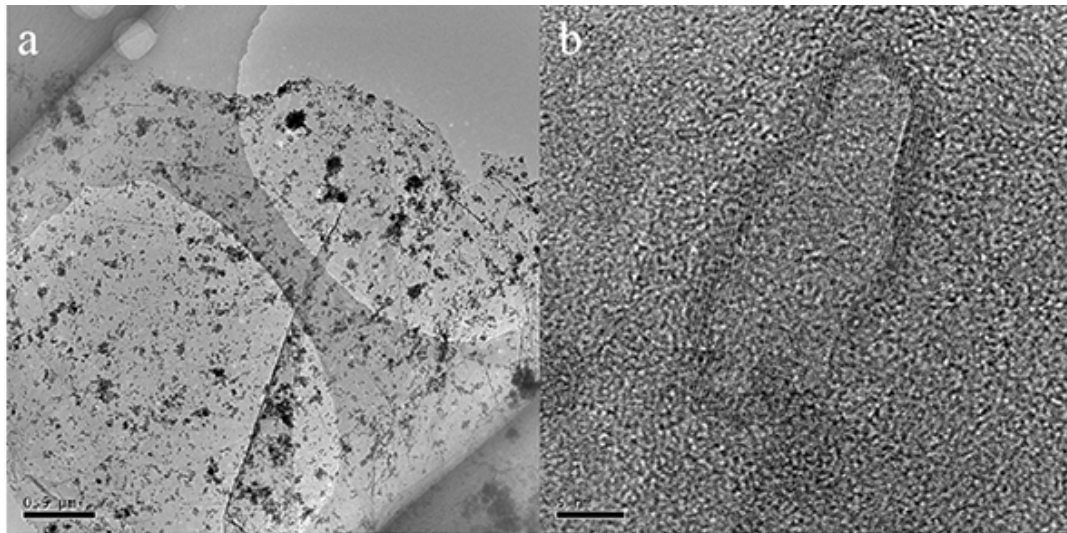

**Fig. S3(a)**The TEM image and **(b)** HRTEM image of G-Fe<sub>3</sub>O<sub>4</sub>-N after 200th cycles.
